# Supplementary material for: Chain folding in main-chain liquid crystalline polyesters: from π–π stacking toward shape memory
Source: Royal Society of Chemistry journal article supplement (doi:10.1039/c4tc00512k), 2014-05-28
Supplement: c4tc00512k2.pdf [file c4tc00512k2.pdf]

## Supporting Information

### Chain folding in main-chain liquid crystalline polyesters: from $\pi$ - $\pi$ stacking toward shape memory

Rong Yang, Li Chen,\* Chao Ruan, Hai-Yi Zhong and Yu-Zhong Wang\*

*Center for Degradable and Flame-Retardant Polymeric Materials, College of Chemistry, State Key Laboratory of Polymer Materials Engineering, National Engineering Laboratory of Eco-Friendly Polymeric Materials (Sichuan), Sichuan University, Chengdu 610064, China. E-mail: l.chen.scu@gmail.com (L Chen), yzwang@scu.edu.cn (YZ Wang); Fax: +86-28-85410755*

#### 1. $^1\text{H}$ NMR spectrum of 4,4'-bis(6-hydroxyhexyloxy)biphenyl (BHBBP)

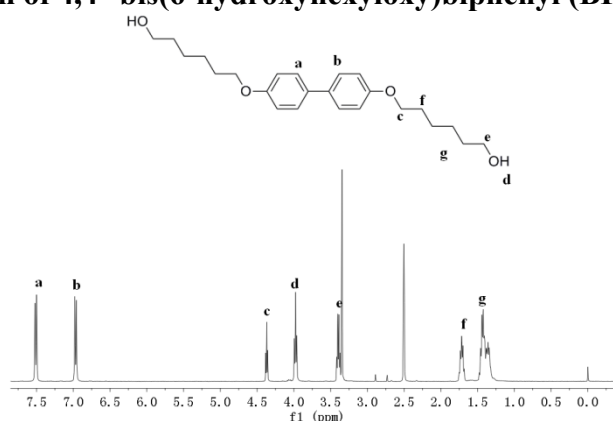

**Figure S1**  $^1\text{H}$  NMR spectrum of 4,4'-bis(6-hydroxyhexyloxy)biphenyl (BHBBP).

#### 2. $^1\text{H}$ NMR spectra of the polyesters

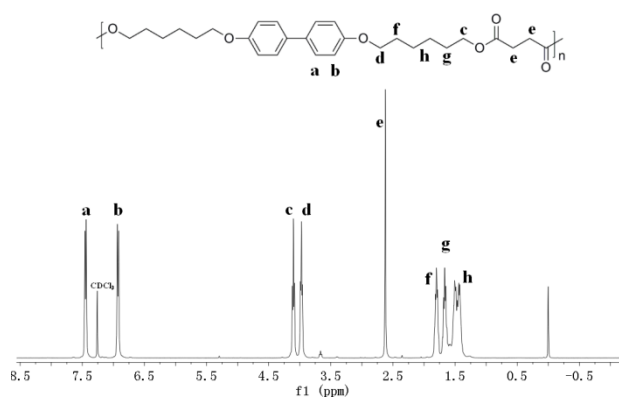

**Figure S2**  $^1\text{H}$  NMR spectrum of PBDS.

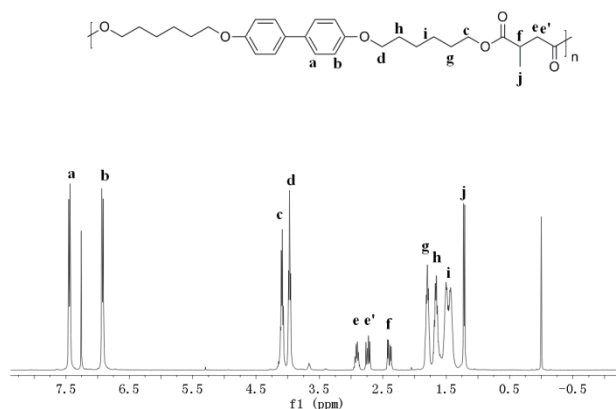

**Figure S3**  $^1\text{H}$  NMR spectrum of PBDMS.

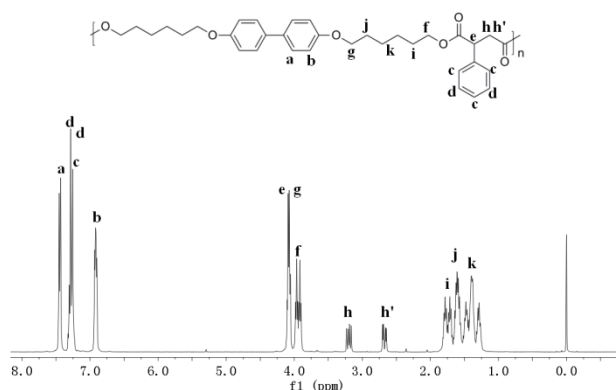

**Figure S4** The  $^1\text{H}$  NMR spectrum of PBDPS.

### 3. Shape memories of PBDS and PBDMS

For comparing the shape-memory behaviors of these polyesters, The experimental curves of shape-memory effect for PBDS and PBDMS are shown in Fig. S5. As shown in the stress-strain curve, PBDS is very brittle even at the temperature close to its isotropic transition, therefore it could not fulfil the shape-memory experiment. As for PBDMS, it exhibited excellent shape fixity; however, its recovery ratio is only 30 %. Compared to PBDS, PBDMS showed certain ability for shape memory, due to its chain folding configuration. However, the shape recovery of PBDMS was not satisfied because of the absence of  $\pi$ - $\pi$  interaction acting as a physical netpoint.

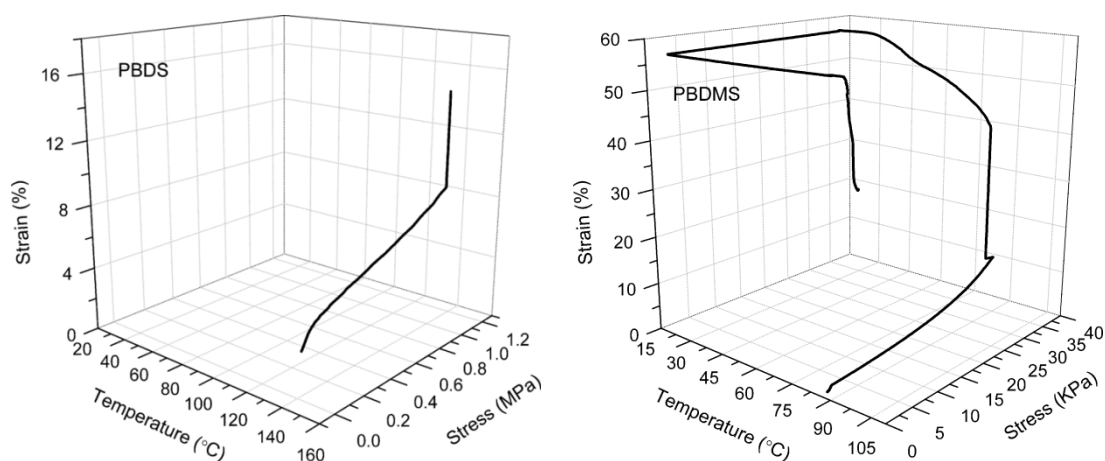

**Figure S5** 3D diagram of one-way shape memory cycle for PBDS (left) and PBDMS (right).

#### **4. Real time movie picturing the shape memory effect of PBDPS**

Please check the multimedia document (Shape Memory of PBDPS.mp4) on-line (Shape deformed at 50 °C and recovered at 75 °C in water bath).
